1 Population genomics of *Wolbachia* and mtDNA in *Drosophila simulans* from California

2

3 Sarah Signor\*

4

5

6 \*Department of Molecular and Computational Biology, University of Southern California, Los Angeles,

7 California USA

8 Key words: *Drosophila simulans*, population genetics, *Wolbachia*

9

10 Communicating Author: Sarah Signor

11 Section of Molecular and Computational Biology

12 University of Southern California

13 Los Angeles, California USA

14 [ssignor@usc.edu](mailto:ssignor@usc.edu)

15 Phone 213-740-3065

16

17

18

19

20

21

22 ABSTRACT: *Wolbachia pipientis* is a widespread intracellular endosymbiont infecting many arthropods  
23 and filarial nematodes. Little is known about the short-term evolution of *Wolbachia* or its interaction with  
24 its host. *Wolbachia* is maternally inherited, resulting in co-inheritance of mitochondrial organelles such as  
25 mtDNA. Here we explore the short-term evolution of *Wolbachia*, and the relationship between  
26 *Wolbachia* and mtDNA, using a large inbred panel of *Drosophila simulans* infected with the *Wolbachia*  
27 strain *w*Ri. We find reduced diversity relative to expectation in both *Wolbachia* and mtDNA, but only  
28 mtDNA shows evidence of a recent selective sweep or population bottleneck. We find that all individuals  
29 in the population are infected, and we estimate *Wolbachia* and mtDNA titre in each genotype. We find  
30 considerable variation in both phenotypes, despite low genetic diversity in *Wolbachia* and mtDNA. A  
31 phylogeny of *Wolbachia* and of mtDNA show that both trees are largely unresolved, suggesting a recent  
32 origin of the infection and a single origin. Using *Wolbachia* and mtDNA titre as a phenotype, we perform  
33 an association analysis with the nuclear genome and find several regions implicated in the phenotype,  
34 including one which contains four CAAX-box protein processing genes. CAAX-box protein processing  
35 can be an important part of host-pathogen interactions in other systems, suggesting interesting directions  
36 for future research.

37

38

39

40

41

42

43

44 INTRODUCTION:

45 Heritable symbiotic associations such as that between *Drosophila* and *Wolbachia pipientis* have  
46 widespread impact on host ecology and evolution. These types of heritable endosymbiotic relationships  
47 are recognized as key drivers of evolution, but the intraspecific variation that effects their short-term  
48 evolution is not well explored. *Wolbachia* are  $\alpha$ -proteobacterial endosymbionts found in up to 40% of all  
49 arthropod species<sup>1-3</sup>. *Wolbachia* are maternally transmitted and spread through manipulating the  
50 reproductive strategies of their host, using mechanisms such as feminization, male-killing, or cytoplasmic  
51 incompatibility. The most common of these is cytoplasmic incompatibility, where mating between males  
52 and females of the same species results in embryonic mortality if they have different *Wolbachia* infection  
53 status<sup>4-8</sup>. *Wolbachia* may also confer certain protections upon their host, such as increased resistance to  
54 certain viruses, or increased survival when exposed to certain environmental stressors<sup>9-15</sup>. *Wolbachia* is  
55 one of the most abundant obligate intracellular parasites, given that 85% of animal species are insects.  
56 This has profound meaning for evolutionary processes such as sexual selection and speciation<sup>16,17</sup>.

57 *Wolbachia* strain wRi is known to have spread recently in the sister species to the model organism  
58 *Drosophila melanogaster*, *D. simulans*<sup>4,5,8,18</sup>. It was at ~95-100% frequency in Southern California  
59 populations at the time its original sampling in the 1980's<sup>19,20</sup>. It likely invaded California less than 25  
60 years before it was first detected in 1984<sup>21</sup>. It is now thought to have been horizontally transmitted to *D.*  
61 *simulans* from *D. ananassae*, though the same strain is also found in *D. suzukii*<sup>22</sup>. The maternal  
62 transmission of *Wolbachia* means that as the microorganism spreads all maternally inherited organelles  
63 spread along with it. Most notably mtDNA will be forced through a bottleneck, lowering the diversity of  
64 mtDNA in infected populations<sup>18,23,24</sup>. This will cause mtDNA and *Wolbachia* to be more closely  
65 associated than nuclear genes, and this coupling has been demonstrated previously in *D. simulans*<sup>18,25,26</sup>. In  
66 fact, *D. simulans* is known to have three major mitochondrial haplotypes (*siI*, *siII*, and *siIII*) and two  
67 subtypes (*siIIA* and *siIIB*) that harbor very little variation and that appear to be nonrandomly associated  
68 with *Wolbachia* strains<sup>27-29</sup>. These mitochondrial haplotypes are largely allopatric, except for the presence

69 of both *siII*, and *siIII* in Madagascar and La Reunion<sup>30</sup>.

70 In *D. melanogaster* variation in *Wolbachia* has been well investigated using genomic data,  
71 namely in five populations from around the world, though this has not been done in the genomic era in *D.*  
72 *simulans*<sup>31</sup>. They found long lived associations between mitochondrial and *Wolbachia* haplotypes and  
73 strong geographic structuring among cytotypes<sup>31-33</sup>. This study also observed that *Wolbachia* titre varied  
74 among fly populations as the result of intraspecific nuclear genetic variation<sup>31</sup>. However, the assumption  
75 that it was due to intraspecific nuclear background was based on the presence of a constant environment  
76 and no polymorphisms were identified. Very little is known about how *Wolbachia* interact with their  
77 hosts, though recent work has uncovered evidence that deubiquitylating enzymes produced by *Wolbachia*  
78 and secreted into the host cytoplasm mediate cytoplasmic incompatibility<sup>34</sup>. *Wolbachia* DNA is also  
79 frequently inserted into the host genome, though this has not occurred with *wRi* in *D. simulans*<sup>21</sup>. Genes  
80 involved in the formation of germline stem cells such as *benign gonial cell neoplasm* and *bag-of-marbles*  
81 are considered candidates for interacting with *Wolbachia*, and have been found to have unusual  
82 population genetic patterns in *D. melanogaster*<sup>35,36</sup>. *bag-of-marbles* has been suggested to interact with  
83 *Wolbachia* due to fertility rescue in hypomorphs, but the interaction of this gene with *Wolbachia* in  
84 natural populations is not clear<sup>22,35-37</sup>. Notably, *Wolbachia* localizes in tissues differently depending upon  
85 the strain and species so the interactions between the host and *Wolbachia* are likely to also be  
86 different<sup>38,39</sup>.

87 *Wolbachia* infections must be maintained in host populations through transovarial transmission,  
88 wherein *Wolbachia* is present in the germline at sufficient copy number to ensure transmission but not to  
89 cause host pathology<sup>40</sup>. *Wolbachia* titre has been shown to have important phenotypic effects on the  
90 host<sup>11,41-49</sup>. However, control of *Wolbachia* replication is not well understood, nor is the dependence of  
91 this control on host background versus bacterial genotype<sup>11,50-52</sup>. Differences in *Wolbachia* titre when it is  
92 transinfected between species suggests a role of host background in controlling copy number, population  
93 genomics in *D. melanogaster* suggest an effect of host background, and there does seem to be host-

94 specific patterns of tissue colonization<sup>53-55</sup>. However, multiple *Wolbachia* genotypes can also behave  
95 differently in the same genetic background suggesting contributions from the bacterial genome<sup>51,56</sup>. It is  
96 also possible to select for greater *Wolbachia* densities, though the heritability of this is unclear<sup>57,58</sup>.

97         Here I investigate the dynamics of *Wolbachia* and mtDNA in a large panel of *D. simulans* from a  
98 single Californian population. I determine infection status of *Wolbachia* in the panel of *D. simulans*  
99 genotypes. I look for signatures of selection in both genomes using summary statistics Tajima's  $D$  and  $\pi$   
100 and find that while *Wolbachia* patterns of variation are not unusual given its demographic history the  
101 reduction in mtDNA diversity is suggestive of a recent bottleneck due either to selection or changes in  
102 population size. I also measure linkage disequilibrium between mtDNA and *Wolbachia* as a proxy for co-  
103 inheritance. Using whole genome sequences, I investigate the phylogeny of both *Wolbachia* and mtDNA  
104 and find that in this population they are essentially unresolved. I investigate variation in the copy number  
105 of both *Wolbachia* and mtDNA in this population using relative estimates derived from illumina  
106 sequencing coverage compared to nuclear coverage. I find considerable copy number variation in this  
107 population, and an association analysis using this as a phenotype implicates several genomic regions  
108 potentially involved in mediating this phenotype. This includes a region containing multiple genes  
109 involved CAAX-box protein prenylation, a process that is important for mediating the relationship  
110 between host and pathogen in other systems<sup>59-61</sup>.

## 111 METHODS

### 112 ***Drosophila* strains**

113 Strains are as described in<sup>62</sup>. Briefly, the *D. simulans* lines were collected in the Zuma organic orchard in Zuma  
114 beach, California in February of 2012 from a single pile of fermenting strawberries. Single mated females were  
115 collected and inbred by 15 generations of full sib mating of their progeny. *Drosophila* were raised at a constant  
116 temperature of 20° C with 12-hour light/dark cycles. They were raised on a standard glucose/yeast media, and  
117 each library was constructed from adult females of similar age (less than one week).

### 118 **Data sources and processing**

119 The sequencing reads were downloaded from the NCBI Short Read Archive from project SRP075682.  
120 Libraries were assembled using BWA mem (v. 0.7.5), and processed with samtools (v. 0.1.19) using  
121 default parameters<sup>63,64</sup>. The *Wolbachia* reference is the *w*Ri strain previously identified in Southern  
122 California (Accession number NC\_012416)<sup>21</sup>. The mtDNA reference is from *D. simulans* *w*<sup>501</sup>, which is  
123 haplogroup *siII* as expected for *D. simulans* from California (Accession number KC244284)<sup>65</sup>. PCR  
124 duplicates were removed using Picard MarkDuplicates (v. 2.9.4) and GATK (v. 3.7) was used for indel  
125 realignment and SNP calling using default parameters (<http://picard.sourceforge.net>)<sup>66</sup>. SNPs were called  
126 jointly for all genotypes using Haplotypecaller<sup>66</sup>. Individual consensus fasta sequences were produced  
127 using SelectVariants to create individual vcf files and FastaAlternateReferenceMaker. Vcf files were  
128 filtered for indels and non-biallelic SNPs using VCFtools (v. 0.1.13)<sup>67</sup>. The files were also filtered for  
129 SNPs with more than 10% missing data and a minor allele frequency of 2%, meaning that each SNP must  
130 be in the population in at least approximately 3 copies. The *Wolbachia* genome was filtered for regions of  
131 unusual coverage or SNP density, for example two regions of the *Wolbachia* genome harbored ~40 SNPs  
132 within two kb, far above background levels of variation (Supp. File \_ for an example). These two regions  
133 coincided with regions of unusually high coverage suggesting they are repeated elements.

#### 134 **Prediction of *Wolbachia* infection status**

135 *Wolbachia* infection status was determined by calculating the mean depth of coverage of the assembly  
136 and the breadth of coverage of the consensus sequence using bedtools<sup>68</sup>. Depth of coverage at each  
137 nucleotide was estimated using the genomecov function, while breadth was estimated using the coverage  
138 function. Predictions of *Wolbachia* infection status using illumina data have previously been shown to  
139 have 98.8% concordance with PCR based predication of infection status<sup>32</sup>.

#### 140 **Nucleotide diversity**

141 Levels of polymorphism for mtDNA and *Wolbachia* were estimated as  $\pi$  in 10 kb windows. To  
142 investigate whether the frequency spectrum conformed to the standard neutral model of molecular  
143 evolution we calculated Tajima's *D* in 10 kb windows using VCFtools (v0.1.14)<sup>69</sup>. To assess the

144 significance of deviations in Tajima's  $D$  and  $\pi$  10,000 simulations were performed using msms  
145 conditioned on the number of variable sites and with no recombination<sup>70</sup>.

#### 146 **Linkage disequilibrium**

147 Linkage between *Wolbachia* and mtDNA SNPs could potentially be a predictor of co-inheritance of  
148 mtDNA and *Wolbachia*. Linkage was estimated using VCFtools (v0.1.14) using inter-chrom-geno-r2 to  
149 estimate  $r^2$  between the two genomes<sup>67</sup>.

#### 150 **Estimation of mtDNA and *Wolbachia* copy number**

151 In insects, the phenotypic effect of *Wolbachia* will vary depending upon copy number in the host cells<sup>9,32</sup>.  
152 Given that there are two copies of autosomal DNA in a cell, we infer mtDNA and *Wolbachia* copy  
153 number based on the ratio between mtDNA and autosomal DNA. This is intended to provide a relative  
154 estimate of copy number rather than an absolute measure. Relative copy number estimated in this way  
155 obscures intra-individual variation and variation between tissues, though the authors note that all flies  
156 used in constructing the libraries were females of approximately the same age. *Wolbachia* contains  
157 several regions which were excluded due to unusually high coverage across all samples (more than 3x the  
158 mean coverage). Average coverage was calculated from randomly chosen and equivalently sized nuclear  
159 regions for each mtDNA (Scf\_3L:8000000..8014945) and *Wolbachia* (Scf\_2L:11000000..11445873).  
160 The average coverage of each nuclear region, respectively, was then used to normalize estimates of copy  
161 number for each genotype. Previously the results of measuring *Wolbachia* copy number in the same  
162 samples using both qPCR and estimates from illumina read depth had a Pearson's correlation coefficient  
163 of .79, thus this is a robust approach to measuring *Wolbachia* titre<sup>31</sup>.

#### 164 **Phylogenomic analysis**

165 To understand the relationship between *Wolbachia* infection and mtDNA we reconstructed the  
166 genealogical history of each within the sample population. Multiple alignments were generated for both  
167 mtDNA and *Wolbachia* by concatenating fasta consensus sequence files for each genotype. All indels and  
168 non-biallelic SNPs were excluded from the dataset prior to generating the consensus fasta for each  
169 genotype. RAxML version 8.10.2 was used to reconstruct phylogenies<sup>71</sup>. Maximum likelihood tree

170 searches were conducted using a general time reversible (GTR) model of nucleotide substitution with  
171 CAT rate heterogeneity and all model parameters estimated by RAxM<sup>72</sup>. Trees were inferred using the  
172 rapid bootstrap algorithm and simultaneous estimation of trees and bootstrapping, with automatic  
173 estimation of the necessary number of bootstrap replicates.

#### 174 **Association Analysis**

175 In order to focus on regions that may have been affected by selection due to the recent invasion of  
176 *Wolbachia* we used a subset of the genome identified previously as exhibiting haplotype structure  
177 suggestive of recent selection<sup>62,73</sup>. These regions are unusually long haplotype blocks, thus many of the  
178 SNPs within each block are not independent, reducing the need for correction due to multiple testing.  
179 Heterozygous bases were coded as missing, and all loci with more than 10% missing data were excluded  
180 from the analysis, as well as SNPs with a minor allele frequency of less than 2%, meaning they were  
181 present in the population in at least 3 copies. mtDNA and *Wolbachia* copy number were used for a  
182 multivariate analysis of association using plink.multivariate<sup>74</sup>. To investigate the possibility that  
183 *Wolbachia* copy number is affected by polymorphisms in mtDNA, and vice versa, a single trait analysis  
184 was performed using plink v. 1.07<sup>75</sup>.

185

## 186 **RESULTS**

### 187 **Sequencing Data**

188 The autosomal data included in this analysis was reported in<sup>62</sup>. There was very little variation in both  
189 *Wolbachia* and mtDNA in this population. This included 78 SNPs and indels in the *Wolbachia* genome  
190 and 90 in mtDNA. Reduced diversity has been reported previously in *D. simulans* mtDNA<sup>24,25</sup>. The  
191 authors note that previous work has established that there is no unusual relatedness in the nuclear genome  
192 of this population<sup>62</sup>.

### 193 **Infection status**

194 In a previous study lines were scored as infected if they had a breadth of coverage greater than 90% and a  
195 mean depth greater than one<sup>32</sup>. However, that dataset had a clearly bimodal distribution between infected



196 and uninfected lines, where uninfected lines had breadth of coverage less than 10% while infected lines  
197 had a breadth of coverage of greater than 90%. As such that this demarcation was a natural interpretation  
198 of the data<sup>32</sup>. In *D. simulans*, all lines had ~99% breadth of coverage aside from a single line with both a  
199 lower overall depth of coverage and 80% breadth (Fig. 1). For this reason, all lines were scored as  
200 infected. 100% infection is not unusually high for *D. simulans*.

### 201 **Nucleotide Diversity**

202 Estimates of  $\pi$  in *Wolbachia* ranged from  $5.98 \times 10^{-7}$  to  $1 \times 10^{-3}$ , with an average of  $1.42 \times 10^{-5}$ , within the  
203 range of estimates from *D. melanogaster* in another study ( $7.9 \times 10^{-6} - 2.8 \times 10^{-5}$ <sup>31</sup>). The mean of  $\pi$  in  
204 simulated populations of *Wolbachia* is  $1.9 \times 10^{-3}$  suggesting that variation is somewhat reduced in  $wRi$ .  $\pi$   
205 in mtDNA is  $1 \times 10^{-4}$  which again is similar to estimates from *D. melanogaster* ( $4.34 \times 10^{-4} - 1.51 \times 10^{-3}$   
206 <sup>31</sup>). However, compared to simulated populations this is reduced, as the mean of 10,000 simulations is  $1 \times$   
207  $10^{-3}$ .

208 Overall Tajima's  $D$  was estimated to be -2.4 for *D. simulans* mtDNA (Fig 2). This is similar to  
209 estimates in *D. melanogaster*<sup>32</sup>. Significance of this estimate was assessed using 10,000 simulations in  
210 msms conditioned on the number of segregating sites and no recombination, and it is significant at  $p$   
211  $< .05$ . Tajima's  $D$  in *Wolbachia* is not significantly different from expectations under neutrality based on  
212 10,000 simulations. Thus, while a selective sweep seems to have strongly effected mtDNA in *D.*  
213 *simulans*, the same is not true of the *Wolbachia* population (Fig 2). This is very different from *D.*  
214 *melanogaster* where *Wolbachia* and mtDNA had similar patterns of nucleotide diversity<sup>32</sup>.

215 This is also much more negative than previously reported for mtDNA in *D. simulans*<sup>25</sup>. It is very  
216 different from the general patterns of Tajima's  $D$  in the nuclear genome, where average Tajima's  $D$  is 1  
217 and the majority of the genome has a positive Tajima's  $D$ . Simulations in previous work suggest that the  
218 pervasively positive values in the nuclear genome may be due to a population contraction, which again  
219 indicates that the population dynamics affecting *D. simulans* nuclear and mtDNA genomes are very  
220 different<sup>25,62</sup>.

### 221 **Linkage disequilibrium**

222 There was no significant linkage disequilibrium between the genomes of *Wolbachia* and *D. simulans*  
223 mtDNA. Average LD between *Wolbachia* and mtDNA SNPs was  $2.06 \times 10^{-3}$ . This may be because the  
224 infection of *D. simulans* was too recent for variation to accumulate along particular lineages, and also  
225 suggests that *D. simulans* was infected by a single invasion. As all strains were infected with *Wolbachia* it  
226 is also possible that variation in both lineages is fixed rather than sorting in the population.

227

### 228 **Estimation of mtDNA and *Wolbachia* copy number**

229 There was considerable heterogeneity in both *Wolbachia* and mtDNA copy number (Fig. 1). Mean  
230 (standard deviation) copy number of *Wolbachia* is 5.56 (2.45). This is similar to one estimate in *D.*  
231 *melanogaster*, where mean copy number is 5.57 (3.95) though the standard deviation is lower in *D.*  
232 *simulans*<sup>32</sup>. The reported mean was lower in other populations of *D. melanogaster*, though still within the  
233 same range (2 - 4.5)<sup>31</sup>. Similarly mean mtDNA copy number is 33.85 (15.5) in *D. simulans* and 32.9  
234 (44.5) in one estimate for *D. melanogaster*<sup>32</sup>. This is again not an absolute measure, but relative to nuclear  
235 genomic coverage. The lower standard deviation could be due to more precise staging of the age of *D.*  
236 *simulans*, less background variation effecting copy number (the *D. melanogaster* sample was from  
237 multiple populations), or other unknown mechanisms. There was a positive relationship between mtDNA  
238 and *Wolbachia* copy number (Fig. 1) ( $p < 2.4 \times 10^{-7}$ ).

### 239 **Phylogenomic analysis**

240 To understand the relationship between *Wolbachia* infection status and mtDNA sequence variation we  
241 reconstructed the phylogenetic history of the complete *Wolbachia* and mtDNA genome using the entire  
242 set of 167 strains (Fig 3-4). What we found is consistent with the recent spread of *Wolbachia* in *D.*  
243 *simulans*, as both phylogenies are essentially unresolved. This is not unexpected for mtDNA given  
244 previous work in the species which found little within-haplotype variation among the three major mtDNA  
245 haplotypes in *D. simulans*<sup>25,28</sup>. Furthermore, of the 167 sequences 88 are identical to at least one other  
246 sequence in the sample. While the *Wolbachia* phylogenetic tree gives the impression of having more  
247 resolution than mtDNA, this is likely due to the larger genome, as the branches have similarly low

248 support. Of the 167 strains included in the tree 18 are identical to one or more *Wolbachia* genomes. Both  
249 trees are essentially star phylogenies with the majority of bootstrap support values being less than 30.  
250 Bootstrap support of greater than 70, for two branches in the mtDNA tree and five in the *Wolbachia* tree,  
251 is shown (Fig 3-4). If uninfected individuals had been included in the dataset perhaps it would be possible  
252 to test for congruence between the two phylogenies, however the essentially unresolved trees make it  
253 clear that both *Wolbachia* and mtDNA swept the population recently.

254

### 255 **Association Analysis**

256 Association analysis was performed using `plink.multivariate` by regressing the line means for mtDNA and  
257 *Wolbachia* copy number on each SNP contained within the previously identified in a scan for selection<sup>62</sup>.  
258 This scan for selection focused on identifying haplotype blocks in LD. This considerably reduces the  
259 number of SNPs tested for association, in addition to the fact that the SNPs are in haplotype blocks and  
260 are therefore not independent tests<sup>62,73</sup>. This reduces the need for correction due to multiple testing. We  
261 used a *p*-value cut-off of  $p < 9 \times 10^{-6}$  and identified 16 SNPs associated with *Wolbachia* and mtDNA copy  
262 number. Of these 16 SNPs 13 are located in the same region on chromosome 2R (Scf\_2R: 13550916-  
263 13569038). Given the concentration of significant SNPs in a single region, this is also the region we will  
264 focus on the most in the following discussion. The region containing 13 SNPs contains nine genes, four of  
265 which are involved in CAAX-box protein processing, *ste24a-c* and a recent duplicate of *ste24c* CG30461.  
266 CAAX-box protein processing is a part of a series of posttranslational protein modifications collectively  
267 called protein prenylation which are required for fully functional proteins to be targeted to cell  
268 membranes or organelles. It has been shown that pathogenic bacteria can exploit the host cell's  
269 prenylation machinery, though it is unclear if this occurs in *Wolbachia*<sup>59</sup>.

270 The other five genes are *AsnRs-m*, which is largely unannotated but is thought to a mitochondrial  
271 aminoacyl-tRNA synthetase<sup>76</sup>. *NIPP1Dm* is involved in axon guidance and negative regulation of protein  
272 phosphorylation<sup>77,78</sup>. *CG6805* is generally unannotated but is inferred to be involved in

273 dephosphorylation<sup>76</sup>. *Cbp53E* regulates neural development<sup>79</sup>. Lastly, *Ehbp1* is a developmental gene  
274 implicated in regulation of the Notch pathway and membrane organization<sup>80</sup>.

275         Of the other three SNPs identified in this association analysis two are located at Scf\_2R:5814103  
276 and Scf\_2R:5811043, while the third is located at Scf\_3L:2055556. Scf\_2R:5811043 and  
277 Scf\_2R:5814103 are located in *Su(var)2-10* and *Phax*, respectively. These are neighboring genes, though  
278 there is a third gene within 10 kb, *Mys45A*. *Su(var)2-10* is involved in development and chromosome  
279 organization, but it has also been implicated in the regulation of the innate immune response and defense  
280 against Gram-negative bacteria<sup>81</sup>. *Su(var)2-10* is of particular interest given that *Wolbachia* are Gram-  
281 negative bacteria, however the potential role of *Su(var)2-10* in immune response is not clear. *Phax* is not  
282 well annotated but is inferred to be involved in snRNA export from the nucleus<sup>79</sup>. *Mys45A* is potentially  
283 involved in actin cytoskeleton organization<sup>79</sup>. In *D. melanogaster* *Wolbachia* uses host actin for maternal  
284 transmission, though this has not been verified in *D. simulans*<sup>82</sup>. The last SNP, at Scf\_3L:2055556, is in  
285 *Connectin*, a cell adhesion protein also involved in axon guidance<sup>83</sup>.

286         The identification of these SNPs in association with mtDNA and *Wolbachia* copy number does  
287 not imply a functional relationship. Nonetheless, we chose to investigate whether any of these  
288 substitutions had an effect on the coding sequence of any of genes in the region. Of the three SNPs found  
289 outside the region containing the CAAX-box proteins all were either in introns or regulatory regions. Of  
290 the 13 SNPs identified between Scf\_2R: 13550916-13569038 eight are in introns or untranslated regions,  
291 including one in the long intron of *Cb53E*, three in the introns or noncoding transcript of *CG6805*, and  
292 two in the introns of *Ephb*. Of the remaining five SNPs four are in coding regions but silent, causing no  
293 change in the amino acid sequence of the protein. This includes silent mutations in the exons of *ste24c*  
294 and two silent mutations in the exons of *Ephb*. One SNP located in an exon of *ste24a*, at 13558515, is an  
295 amino acid substitution from a Leucine to a Valine. This is not an uncommon amino acid substitution<sup>84,85</sup>,  
296 though it can be associated with phenotypes<sup>86,87</sup>. Mutations in introns and untranslated regions could also  
297 be having an effect on gene expression or processing, as could other linked SNPs in the region that were  
298 not included in the analysis.

299

### 300 *Association between Wolbachia and mtDNA*

301 Association analysis was performed using plink by regressing the line means for mtDNA copy number  
302 onto the *Wolbachia* genome and vice versa<sup>75</sup>. There was no association between *Wolbachia* SNPs and  
303 mtDNA copy number, but the opposite was not true. One SNP in the *D. simulans* mtDNA affected  
304 *Wolbachia* copy number at  $p < 3.18 \times 10^{-6}$ . It is located in the *D. simulans* homolog of *D. melanogaster*  
305 *srRNA* which has been implicated in pole cell formation<sup>88</sup>. *Wolbachia* is incorporated into the pole cells,  
306 the precursor to the germline, in order to be transmitted<sup>89</sup>.

307

### 308 DISCUSSION

309 Using high through-put sequencing of a large panel of *D. simulans* we have reconstructed the complete  
310 genome sequences of mtDNA and *Wolbachia*. We use these genome sequences to investigate the recent  
311 history of *Wolbachia* and mtDNA in this population, as well as to estimate titre of both *Wolbachia* and  
312 mtDNA. The history of *Wolbachia* in this population is reflected in the essentially star-like phylogeny of  
313 both mtDNA and *Wolbachia*, indicating recent spread and co-inheritance. Lack of variation at mtDNA  
314 and *Wolbachia* suggests a single spread of *wRi* in this population as well as strict vertical transmission in  
315 the maternal cytoplasm. Variation in *Wolbachia* is within the range expected under a neutral model,  
316 however that was not the case for mtDNA which suggests either a selection sweep or a population  
317 bottleneck. Previous studies found similar population genetic patterns at *Wolbachia* and mtDNA in *D.*  
318 *melanogaster*, and thus could not distinguish whether selection on *Wolbachia* was driving similar patterns  
319 in mtDNA or vice versa<sup>31</sup>. The much stronger pattern of negative Tajima's *D* in the mtDNA suggests that  
320 in *D. simulans* selection is in fact mitochondrial. There was no linkage disequilibrium between *Wolbachia*  
321 and mtDNA variants, however this is most likely due to fixation of a single mitochondrial haplotype  
322 without considerable subsequent mutation.

323 Currently little is known about how *Wolbachia* interacts with its host<sup>37-39,82,90</sup>. Understanding these  
324 interactions, including regulation of *Wolbachia* titre, will be key to understanding the evolution of

325 *Wolbachia* and its hosts. By normalizing *Wolbachia* and mtDNA copy number using coverage of the  
326 nuclear genome we are able to obtain estimates of its abundance. Much as in previous work, mtDNA  
327 copy number was higher than *Wolbachia* copy number, though both varied across strains<sup>32</sup>. As all of my  
328 data was produced from adult females, at the same time, using the same techniques, there is no danger  
329 that this is due to differences in methodology among samples<sup>32</sup>. Estimates of copy number were very  
330 similar to previous work in *D. melanogaster*, performed with qPCR, and there has been shown to be a  
331 high correlation between qPCR and illumina estimates of copy number<sup>31,32</sup>. These are not absolute  
332 measures, rather they are relative to one another and to nuclear copy number, and they provide robust  
333 estimates of *Wolbachia* titre within the population. As the *Wolbachia* phylogenetic tree is essentially  
334 unresolved in this population but there is considerable variation in *Wolbachia* titre, it is clear that some  
335 host factors must be affecting variation in *Wolbachia* titre.

336 The history of mtDNA and the nuclear genome is quite divergent in this population. The nuclear  
337 genome has an average Tajima's *D* of 1 and 5 polymorphisms for every 100 bp<sup>62</sup>. Simulations suggest  
338 that this is due to a combination of population contraction and selection, most likely from standing  
339 variation, though many types of sweeps can produce similar signatures<sup>62</sup>. In contrast the mtDNA genome  
340 contains an abundance of low frequency variation, and in fact the majority of mtDNA genomes sampled  
341 in this population are identical. This is consistent with the recent spread, single origin, and maternal  
342 transmission, of *wRi* in *D. simulans*. This is consistent with previous work which found low levels of  
343 mtDNA variation in *D. simulans* within a haplotype<sup>24,91</sup>. This is also consistent with work on *Wolbachia*  
344 which documented the spread of *wRi* in *D. simulans* in the 1980's<sup>4,5,8,18-20</sup>.

345 While it has been proposed elsewhere, the author is not aware of another association analysis of  
346 *Wolbachia* and mtDNA copy number<sup>32</sup>. *Wolbachia* copy number is known to be affected by host  
347 background, but the genes or mechanisms involved are not known<sup>54,55,57</sup>. The fact that four of the nine  
348 genes found in the primary region detected in the association analysis are involved in CAAX-box protein  
349 processing is of particular interest, given the history of this type of gene and intracellular pathogens.  
350 CAAX-box protein processing is a part of a series of posttranslational protein modifications collectively

351 called protein prenylation which are required for fully functional proteins to be targeted to cell  
352 membranes or organelles. Prenylated proteins include Ras, Rac, and Rho. However, it has been shown  
353 that pathogenic bacteria can exploit the host cell's prenylation machinery<sup>59</sup>. For example, *Salmonella-*  
354 *induced filament A* is a protein from *Salmonella typhimurium*, a gram-negative facultative intracellular  
355 bacterium. *Salmonella-induced filament A* has a CAAX motif required for prenylation to occur, it was  
356 shown to be processed by host prenylation machinery, and it is necessary for survival of the  
357 bacterium<sup>60,92,93</sup>. *Legionella pneumophila* Ankyrin B protein exploits the host prenylation machinery in  
358 order to anchor Ankyrin B protein to the membrane of the pathogenic vacuole<sup>61</sup>. Proliferation of  
359 *Legionella pneumophila* requires Ankyrin B, as does the manifestation of Legionnaires disease. Ankyrin  
360 repeat domains are most commonly found in eukaryotes and viruses, though they are rarely found in  
361 bacteria and Archaea<sup>94</sup>. In bacteria they are found in a few obligate or facultative intracellular  
362 Proteobacteria<sup>59</sup>. *Wolbachia* has an unusually high number of Ankyrin repeat domains with rapid  
363 evolution<sup>94</sup>. Ankyrin proteins play a major role in host-pathogen interactions and the evolution of  
364 infections<sup>95,96</sup>. There is no way to know from the current analysis if the Ankyrin repeat genes are  
365 exploiting the host prenylation system but it is an intriguing area for future investigation. The results of  
366 this association analysis suggest that some interaction between the pathogen and its host is targeting the  
367 protein prenylation machinery.

368         There was also an association between a polymorphism in *srRNA*, which has been implicated in  
369 pole cell formation<sup>88</sup>, and *Wolbachia*/mtDNA copy number. Concentration of *Wolbachia* in the posterior  
370 of the embryo, where pole cells are forming, is correlated with degree of cytoplasmic incompatibility<sup>97</sup>. *D.*  
371 *simulans* has been shown to have nearly complete cytoplasmic incompatibility, though it is possible there  
372 are mutations sorting at low frequency that affect this or that mitigate negative phenotypic consequences  
373 of high *Wolbachia* titre. It has also been demonstrated that *gurken* is important in for *Wolbachia* titre in  
374 the germline in *D. melanogaster*, and it is involved in pole cell formation beginning at an earlier stage  
375 than *srRNA* suggesting there could be an interaction between the two factors<sup>88,90</sup>. *D. simulans* wRi has a  
376 different distribution in the cytoplasm from other strains of *Wolbachia*, as it tends to evenly distribute

377 throughout the embryo while other strains are either concentrated at the posterior, or at the anterior of the  
378 embryo away from the pole cells<sup>97</sup>. Future work in related species may show that these different  
379 distributions also mitigate different interactions between host and symbiont, including being effected by  
380 different genes and processes within the host.

381

382

383



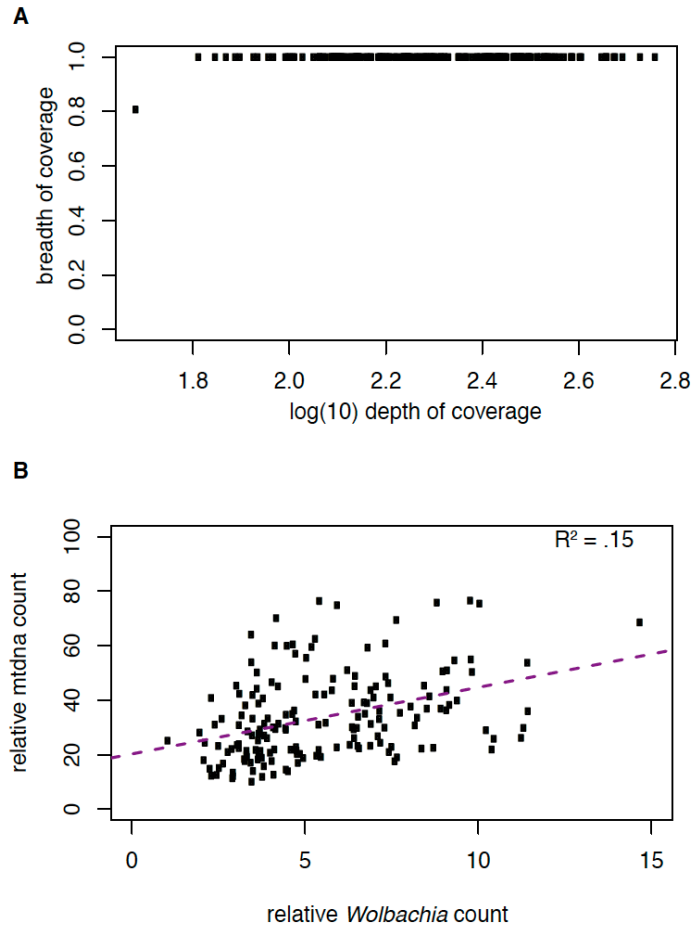

384

**Figure 1. *Wolbachia* infection status and relationship to mtDNA copy number** **A.** Relationship between depth and breadth of sequencing coverage for *Wolbachia* assemblies in the *D. simulans* panel. Depth of coverage is shown in  $\log_{10}$  unites and is calculated as the number of reads present at each nucleotide in the reference averaged over every site. Breadth of coverage is the proportion of covered nucleotides in the consensus sequence relative to the reference. **B.** Relationship between relative mtDNA copy number and *Wolbachia* copy number. Both were normalized relative to nuclear coverage. Although separate regions were used to normalize mtDNA and *Wolbachia*, as they are different sizes, average values were very similar within genotypes. The relationship between mtDNA and *Wolbachia* copy number is positive ( $p < 2.4 \times 10^{-7}$ ).

385

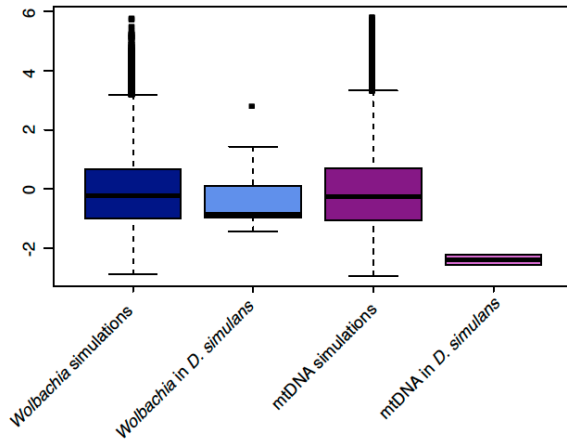

386

387 **Figure 2. *Wolbachia* and mtDNA Tajima's *D*.** 10,000 simulations were performed for *Wolbachia* and  
388 *D. simulans* each conditioned upon the number of polymorphisms. The actual values in *D. simulans*  
389 mtDNA are outside the 95% confidence interval of the simulations, while *Wolbachia* is not. There is  
390 considerable variation in Tajima's *D* across the *Wolbachia* genome while mtDNA is much smaller and  
391 invariant in its values of Tajima's *D*.

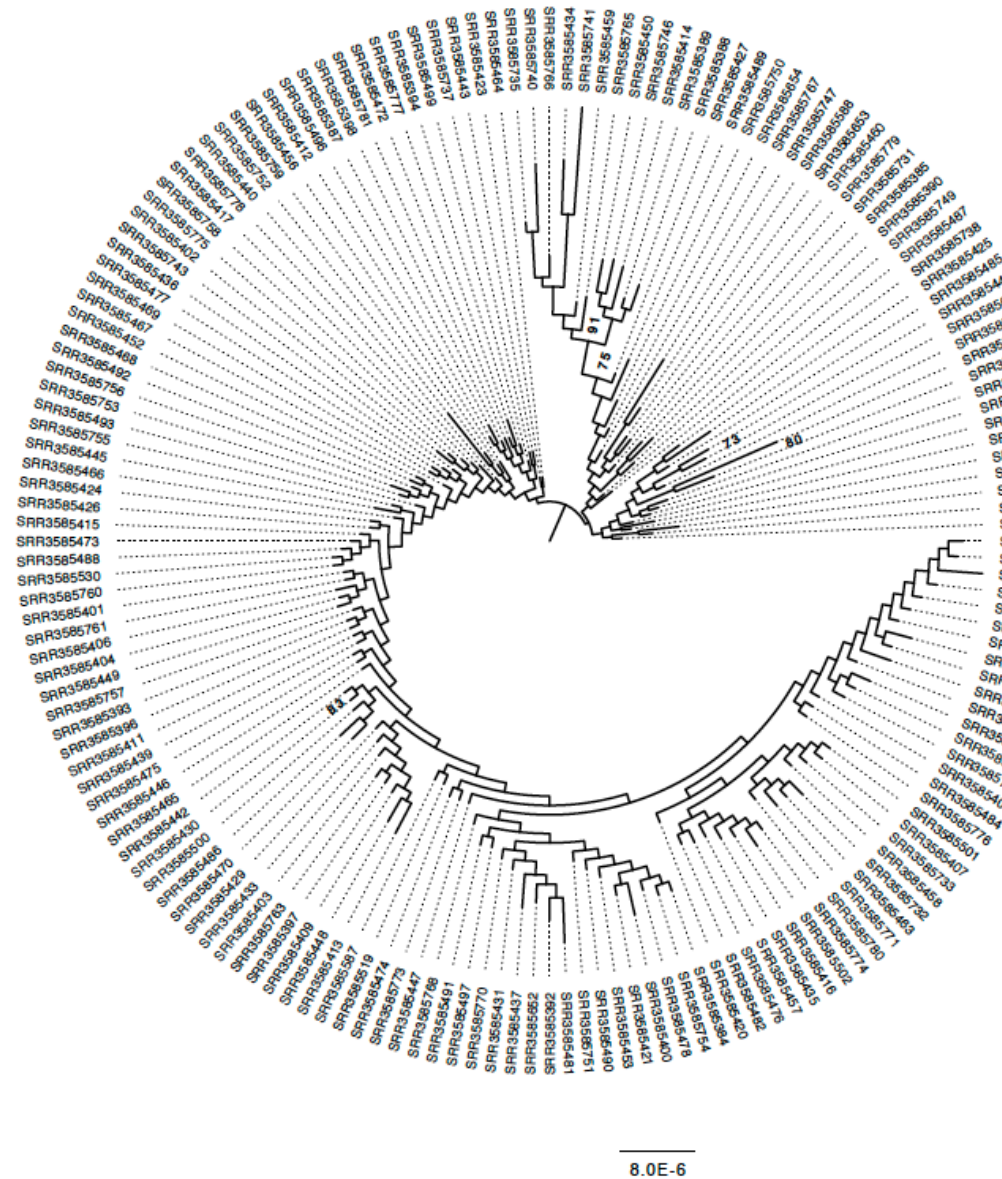

392

**Figure 3: Maximum likelihood genealogy of the *D. simulans* *Wolbachia* pathogen.** All strains were infected with *Wolbachia* and are included in this genealogy. The underlying data consist of an ungapped multiple alignment of 168 sequences of the entire *Wolbachia* genome. The unrooted tree was midpoint rooted for visualization and branches with > 70% RAxML bootstrap support values are shown in bold. Scale bars for branch lengths are in term of mutations per site. The majority of branches are essentially unsupported by bootstrapping.

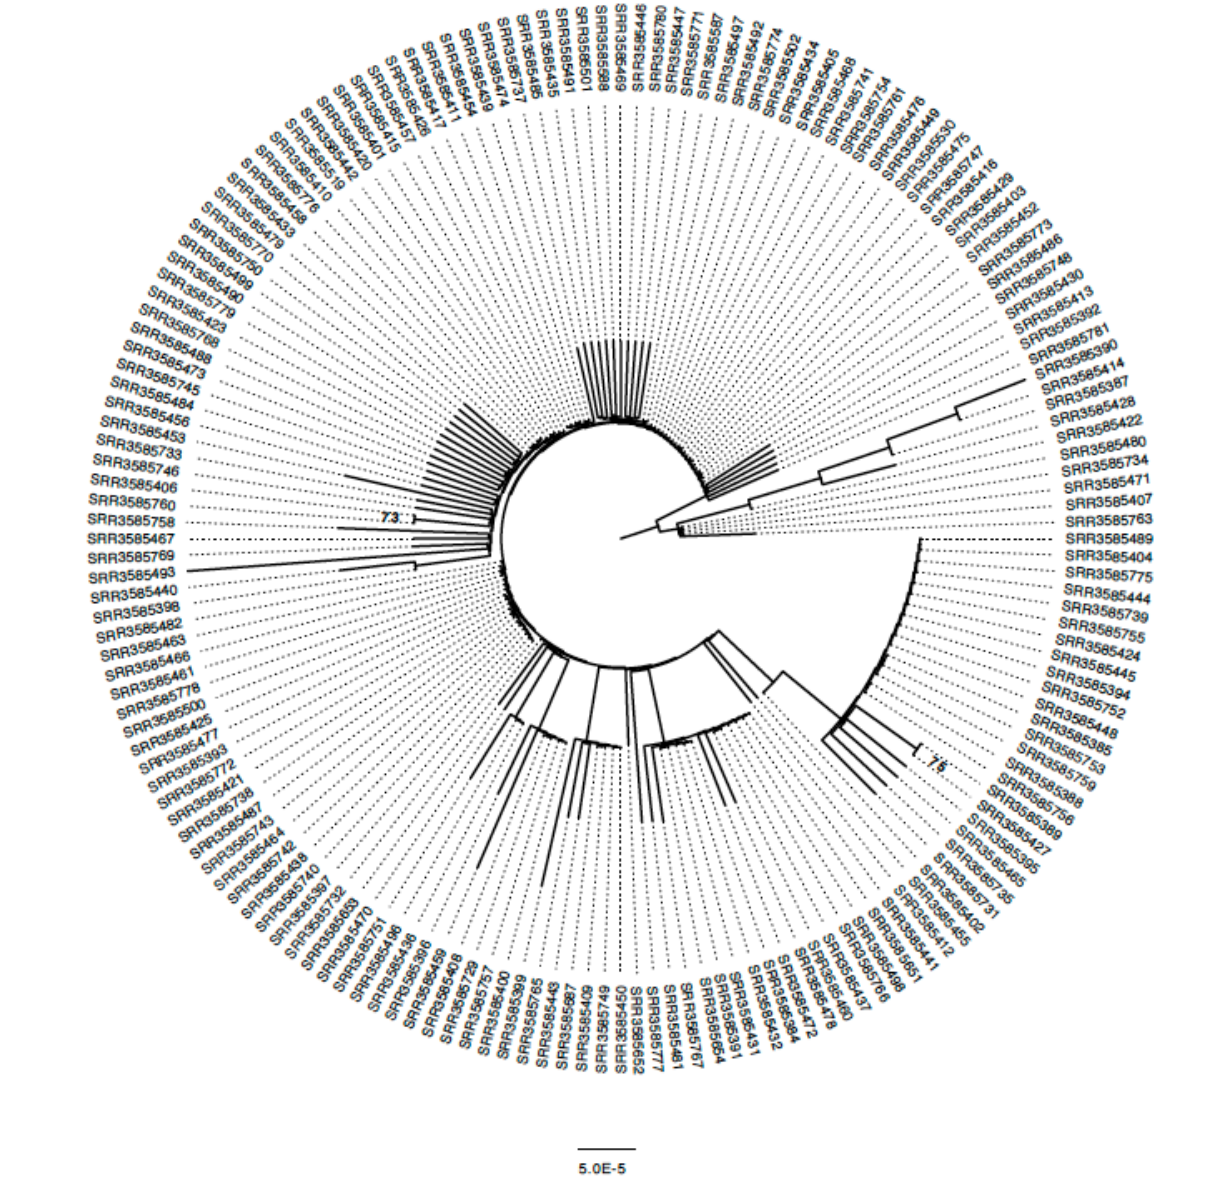

393

**Figure 4: Maximum likelihood genealogy of the *D. simulans* mtDNA genome.** The underlying data consist of an ungapped multiple alignment of 168 sequences of the entire mtDNA genome. The unrooted tree was midpoint rooted for visualization and branches with > 70% RAxML bootstrap support values are shown in bold. Scale bars for branch lengths are in term of mutations per site. The tree is largely unresolved, suggesting recent spread of this mtDNA haplotype through the population.

394

395

396

397

398

1. Zug, R. & Hammerstein, P. Still a host of hosts for Wolbachia: analysis of recent data suggests that 40% of terrestrial arthropod species are infected. *PLoS ONE* 7, e38544 (2012).
2. Hilgenboecker, K., Hammerstein, P., Schlattmann, P., Telschow, A. & Werren, J. H. How

- 399 many species are infected with Wolbachia?--A statistical analysis of current data. *FEMS*  
400 *Microbiol. Lett.* **281**, 215–220 (2008).
- 401 3. Jeyaprakash, A. & Hoy, M. A. Long PCR improves Wolbachia DNA amplification: wsp  
402 sequences found in 76% of sixty-three arthropod species. *Insect Mol. Biol.* **9**, 393–405  
403 (2000).
- 404 4. Turelli, M. & Hoffmann, A. A. Cytoplasmic incompatibility in *Drosophila simulans*:  
405 dynamics and parameter estimates from natural populations. *Genetics* **140**, 1319–1338  
406 (1995).
- 407 5. Turelli, M., Hoffmann, A. A. & McKechnie, S. W. Dynamics of cytoplasmic  
408 incompatibility and mtDNA variation in natural *Drosophila simulans* populations. *Genetics*  
409 **132**, 713–723 (1992).
- 410 6. Charlat, S., Nirgianaki, A., Bourtzis, K. & Merçot, H. Evolution of Wolbachia-induced  
411 cytoplasmic incompatibility in *Drosophila simulans* and *D. sechellia*. *Evolution* **56**, 1735–  
412 1742 (2002).
- 413 7. Rousset, F., Vautrin, D. & Solignac, M. Molecular identification of Wolbachia, the agent of  
414 cytoplasmic incompatibility in *Drosophila simulans*, and variability in relation with host  
415 mitochondrial types. *Proc. R. Soc. B* **247**, 163–168 (1992).
- 416 8. Hoffmann, A. A., Turelli, M. & Harshman, L. G. Factors affecting the distribution of  
417 cytoplasmic incompatibility in *Drosophila simulans*. *Genetics* **126**, 933–948 (1990).
- 418 9. Berticat, C., Rousset, F., Raymond, M., Berthomieu, A. & Weill, M. High Wolbachia  
419 density in insecticide-resistant mosquitoes. *Proc. R. Soc. B* **269**, 1413–1416 (2002).
- 420 10. Wong, Z. S., Hedges, L. M., Brownlie, J. C. & Johnson, K. N. Wolbachia-mediated  
421 antibacterial protection and immune gene regulation in *Drosophila*. *PLoS ONE* **6**, e25430–9  
422 (2011).
- 423 11. Osborne, S. E., Leong, Y. S., O'Neill, S. L. & Johnson, K. N. Variation in antiviral  
424 protection mediated by different Wolbachia strains in *Drosophila simulans*. *PLoS Pathog* **5**,  
425 e1000656–9 (2009).
- 426 12. Fytrou, A., Schofield, P. G., Kraaijeveld, A. R. & Hubbard, S. F. Wolbachia infection  
427 suppresses both host defence and parasitoid counter-defence. *Proc. R. Soc. B* **273**, 791–796  
428 (2006).
- 429 13. Brownlie, J. C. *et al.* Evidence for metabolic provisioning by a common invertebrate  
430 endosymbiont, *Wolbachia pipientis*, during periods of nutritional stress. *PLoS Pathog* **5**,  
431 e1000368 (2009).
- 432 14. Teixeira, L., Ferreira, Á. & Ashburner, M. The bacterial symbiont Wolbachia induces  
433 resistance to RNA viral infections in *Drosophila melanogaster*. *PLoS Biol.* **6**, e1000002  
434 (2008).
- 435 15. Hedges, L. M., Brownlie, J. C. & O'Neill, S. L. Wolbachia and virus protection in insects.  
436 **322**, 702 *Science* (2008).
- 437 16. Jiggins, F. M., Hurst, G. & Majerus, M. Sex-ratio-distorting Wolbachia causes sex-role  
438 reversal in its butterfly host B. *Proc. R. Soc. B* **267**, 69–73.
- 439 17. Koukou, K. *et al.* Influence of antibiotic treatment and Wolbachia curing on sexual isolation  
440 among *Drosophila melanogaster* cage populations. *Evolution* **60**, 87–11 (2006).
- 441 18. Turelli, M. & Hoffmann, A. A. Rapid spread of an inherited incompatibility factor in  
442 California *Drosophila*. *Nature* **353**, 440–442 (1991).
- 443 19. Hoffmann, A. A. & Turelli, M. Unidirectional incompatibility in *Drosophila simulans*:  
444 inheritance, geographic variation and fitness effects. *Genetics* **119**, 435–444 (1988).
- 445 20. Hoffmann, A. A., Turelli, M. & Simmons, G. M. Unidirectional incompatibility between  
446 populations of *Drosophila simulans*. *Evolution* **40**, 692–701 (1986).
- 447 21. Klasson, L. *et al.* The mosaic genome structure of the Wolbachia wRi strain infecting  
448 *Drosophila simulans*. *Proc. Nat. Acad. Sci. USA* **106**, 5725–5730 (2009).
- 449 22. Choi, J. Y. & Aquadro, C. F. The coevolutionary period of *Wolbachia pipientis* infecting



- 450 *Drosophila ananassae* and its impact on the evolution of the host germline stem cell  
451 regulating genes. *Mol. Biol. Evol.* **31**, 2457–2471 (2014).
- 452 23. Ballard, J. W. O. Comparative genomics of mitochondrial DNA in *Drosophila simulans*. *J*  
453 *Mol Evol* **51**, 64–75 (2000).
- 454 24. Ballard, J. W., Hatzidakis, J., Karr, T. L. & Kreitman, M. Reduced variation in *Drosophila*  
455 *simulans* mitochondrial DNA. *Genetics* **144**, 1519–1528 (1996).
- 456 25. Ballard, J. W. O. Comparative genomics of mitochondrial DNA in *Drosophila simulans*. *J*  
457 *Mol Evol* **51**, 64–75 (2000).
- 458 26. Solignac, M., Vautrin, D. & Rousset, F. Widespread occurrence of the proteobacteria  
459 *Wolbachia* and partial cytoplasmic incompatibility in *Drosophila melanogaster*. *C. R. Acad.*  
460 *Sci.* **317**, 461–479 (1994).
- 461 27. Solignac, M. & Monnerot, M. Race formation, speciation, and introgression within  
462 *Drosophila simulans*, *D. mauritiana*, and *D. sechellia* inferred from mitochondrial DNA  
463 analysis. *Evolution* **40**, 531–539 (1986).
- 464 28. Baba-Aïssa, F., Solignac, M., Dennebouy, N. & David, J. R. Mitochondrial DNA variability  
465 in *Drosophila simulans*: quasi absence of polymorphism within each of the three  
466 cytoplasmic races. *Heredity* **61**, 419–426 (1988).
- 467 29. Montchamp-Moreau, C., Ferveur, J. F. & Jacques, M. Geographic distribution and  
468 inheritance of three cytoplasmic incompatibility types in *Drosophila simulans*. *Genetics*  
469 **129**, 399–407 (1991).
- 470 30. James, A. C. & Ballard, J. W. Expression of cytoplasmic incompatibility in *Drosophila*  
471 *simulans* and its impact on infection frequencies and distribution of *Wolbachia pipientis*.  
472 *Evolution* **54**, 1661–1672 (2000).
- 473 31. Early, A. M. & Clark, A. G. Monophyly of *Wolbachia pipientis* genomes within *Drosophila*  
474 *melanogaster*: geographic structuring, titre variation and host effects across five  
475 populations. *Mol. Ecol.* **22**, 5765–5778 (2013).
- 476 32. Richardson, M. F. *et al.* Population genomics of the *Wolbachia* endosymbiont in *Drosophila*  
477 *melanogaster*. *PLoS Genet.* **8**, e1003129 (2012).
- 478 33. Nunes, M. D. S., Nolte, V. & Schlatterer, C. Nonrandom *Wolbachia* infection status of  
479 *Drosophila melanogaster* strains with different mtDNA haplotypes. *Mol. Biol. Evol.* **25**,  
480 2493–2498 (2008).
- 481 34. Beckmann, J. F., Ronau, J. A. & Hochstrasser, M. A *Wolbachia* deubiquitylating enzyme  
482 induces cytoplasmic incompatibility. *Nat Microbiol* **2**, 17007 (2017).
- 483 35. Civetta, A. Rapid Evolution and gene-specific patterns of selection for three genes of  
484 spermatogenesis in *Drosophila*. *Mol. Biol. Evol.* **23**, 655–662 (2005).
- 485 36. Bauer DuMont, V. L., Flores, H. A., Wright, M. H. & Aquadro, C. F. Recurrent positive  
486 selection at *bgen*, a key determinant of germ line differentiation, does not appear to be  
487 driven by simple coevolution with its partner protein *bam*. *Mol. Biol. Evol.* **24**, 182–191  
488 (2006).
- 489 37. Flores, H. A., Bunnell, J. E., Aquadro, C. F. & Barbash, D. A. The *Drosophila bag of*  
490 *marbles* gene interacts genetically with *Wolbachia* and shows female-specific effects of  
491 divergence. *PLoS Genet.* **11**, e1005453 (2015).
- 492 38. Serbus, L. R. & Sullivan, W. A Cellular basis for *Wolbachia* recruitment to the host  
493 germline. *PLoS Pathog* **3**, e190 (2007).
- 494 39. Serbus, L. R., Casper-Lindley, C., Landmann, F. & Sullivan, W. The genetics and cell  
495 biology of *Wolbachia*-host interactions. *Annu. Rev. Genet.* **42**, 683–707 (2008).
- 496 40. McGraw, E. A., Merritt, D. J., Droller, J. N. & O'Neill, S. L. *Wolbachia* density and  
497 virulence attenuation after transfer into a novel host. *Proc. Nat. Acad. Sci. USA* **99**, 2918–  
498 2923 (2002).
- 499 41. Bordenstein, S. R., Marshall, M. L., Fry, A. J., Kim, U. & Wernegreen, J. J. The tripartite  
500 associations between Bacteriophage, *Wolbachia*, and Arthropods. *PLoS Pathog* **2**, e43–10

- 501 (2006).
- 502 42. Martinez, J. *et al.* Should symbionts be nice or selfish? Antiviral effects of Wolbachia are  
503 costly but reproductive parasitism is not. *PLoS Pathog* **11**, e1005021 (2015).
- 504 43. Clark, M. E., Veneti, Z., Bourtzis, K. & Karr, T. L. Wolbachia distribution and cytoplasmic  
505 incompatibility during sperm development: the cyst as the basic cellular unit of CI  
506 expression. *Mech. Dev.* **120**, 185–198 (2003).
- 507 44. Chrostek, E., Marialva, M. S. P., Yamada, R., O'Neill, S. L. & Teixeira, L. High anti-viral  
508 protection without immune upregulation after interspecies Wolbachia transfer. *PLoS ONE* **9**,  
509 e99025 (2014).
- 510 45. Chrostek, E. & Teixeira, L. Mutualism breakdown by amplification of Wolbachia genes.  
511 *PLoS Biol.* **13**, e1002065 (2015).
- 512 46. Chrostek, E. *et al.* Wolbachia variants induce differential protection to viruses in *Drosophila*  
513 *melanogaster*: A phenotypic and phylogenomic analysis. *PLoS Genet.* **9**, e1003896 (2013).
- 514 47. Hoffmann, A. A. *et al.* Successful establishment of Wolbachia in *Aedes* populations to  
515 suppress dengue transmission. *Nature* **476**, 454–457 (2011).
- 516 48. McMeniman, C. J. *et al.* Host adaptation of a Wolbachia strain after long-term serial  
517 passage in mosquito cell lines. *App. Environ. Microbiol.* **74**, 6963–6969 (2008).
- 518 49. Osborne, S. E., Iturbe-Ormaetxe, I., Brownlie, J. C., O'Neill, S. L. & Johnson, K. N.  
519 Antiviral protection and the importance of Wolbachia density and tissue tropism in  
520 *Drosophila simulans*. *App. Environ. Microbiol.* **78**, 6922–6929 (2012).
- 521 50. Kondo, N., Shimada, M. & Fukatsu, T. Infection density of Wolbachia endosymbiont  
522 affected by co-infection and host genotype. *Biol. Lett.* **1**, 488–491 (2005).
- 523 51. Reynolds, K. T., Thomson, L. J. & Hoffmann, A. A. The effects of host age, host nuclear  
524 background and temperature on phenotypic effects of the virulent Wolbachia strain popcorn  
525 in *Drosophila melanogaster*. *Genetics* **164**, 1027–1034 (2003).
- 526 52. Olsen, K., Reynolds, K. T. & Hoffmann, A. A. A field cage test of the effects of the  
527 endosymbiont Wolbachia on *Drosophila melanogaster*. *Heredity* (2001).
- 528 53. Boyle, L., O'Neill, S. L., Robertson, H. M. & Karr, T. L. Interspecific and intraspecific  
529 horizontal transfer of Wolbachia in *Drosophila*. *Science* **260**, 1796–1799 (1993).
- 530 54. Poinot, D., Bourtzis, K., Markakis, G. & Savakis, C. Wolbachia transfer from *Drosophila*  
531 *melanogaster* into *D. simulans*: host effect and cytoplasmic incompatibility relationships.  
532 *Genetics* (1998).
- 533 55. McGraw, E. A., Merritt, D. J., Droller, J. N. & O'Neill, S. L. Wolbachia-mediated sperm  
534 modification is dependent on the host genotype in *Drosophila*. *Proc. R. Soc. B* **268**, 2565–  
535 2570 (2001).
- 536 56. Poinot, D., Montchamp-Moreau, C. & Mercot, H. Wolbachia segregation rate in  
537 *Drosophila simulans* naturally bi-infected cytoplasmic lineages. *Heredity* **85 ( Pt 2)**, 191–  
538 198 (2000).
- 539 57. Boyle, L., O'Neill, S. L., Robertson, H. M. & Karr, T. L. Interspecific and intraspecific  
540 horizontal transfer of Wolbachia in *Drosophila*. *Science* **260**, 1796–1799 (1993).
- 541 58. Perrot-Minnot & Werren. Wolbachia infection and incompatibility dynamics in  
542 experimental selection lines. *J. Evol. Biol.* **12**, 272–282 (1999).
- 543 59. Amaya, M., Baranova, A. & van Hoek, M. L. Protein prenylation: A new mode of host-  
544 pathogen interaction. *Biochemical and Biophysical Research Communications* **416**, 1–6  
545 (2011).
- 546 60. Reinicke, A. T. *et al.* A *Salmonella typhimurium* effector protein SifA is modified by host  
547 cell prenylation and s-acylation machinery. *J. Biol. Chem.* **280**, 14620–14627 (2005).
- 548 61. Price, C. T. D., Al-Quadani, T., Santic, M., Jones, S. C. & Abu Kwaiq, Y. Exploitation of  
549 conserved eukaryotic host cell farnesylation machinery by an F-box effector of *Legionella*  
550 *pneumophila*. *J Exp Med* **207**, 1713–1726 (2010).
- 551 62. Signor, S. A., New, F. & Nuzhdin, S. *in review*. An abundance of high frequency variance

- 552 uncovered in a large panel of *Drosophila simulans*.  
553 63. Li, H. Aligning sequence reads, clone sequences and assembly contigs with BWA-MEM  
554 *arXiv*. 1–3 (2015).  
555 64. Li, H. *et al.* The Sequence Alignment/Map format and SAMtools. *Bioinformatics* **25**, 2078–  
556 2079 (2009).  
557 65. Meiklejohn, C. D. *et al.* An Incompatibility between a mitochondrial tRNA and its nuclear-  
558 encoded tRNA synthetase compromises development and fitness in *Drosophila*. *PLoS*  
559 *Genet.* **9**, e1003238 (2013).  
560 66. McKenna, A. *et al.* The Genome Analysis Toolkit: a MapReduce framework for analyzing  
561 next-generation DNA sequencing data. *Genome Res.* **20**, 1297–1303 (2010).  
562 67. Danecek, P. *et al.* The variant call format and VCFtools. *Bioinformatics* **27**, 2156–2158  
563 (2011).  
564 68. Quinlan, A. R. & Hall, I. M. BEDTools: a flexible suite of utilities for comparing genomic  
565 features. *Bioinformatics* **26**, 841–842 (2010).  
566 69. Tajima, F. Statistical method for testing the neutral mutation hypothesis by DNA  
567 polymorphism. *Genetics* **123**, 585–595 (1989).  
568 70. Ewing, G. & Hermisson, J. MSMS: a coalescent simulation program including  
569 recombination, demographic structure and selection at a single locus. *Bioinformatics* **26**,  
570 2064–2065 (2010).  
571 71. Stamatakis, A. RAxML version 8: a tool for phylogenetic analysis and post-analysis of large  
572 phylogenies. *Bioinformatics* **30**, 1312–1313 (2014).  
573 72. Izquierdo-Carrasco, F., Smith, S. A. & Stamatakis, A. Algorithms, data structures, and  
574 numerics for likelihood-based phylogenetic inference of huge trees. *BMC Bioinformatics*  
575 **12**, 470 (2011).  
576 73. Garud, N. R., Messer, P. W., Buzbas, E. O. & Petrov, D. A. Recent selective sweeps in  
577 North American *Drosophila melanogaster* show signatures of soft sweeps. *PLoS Genet.* **11**,  
578 e1005004 (2015).  
579 74. Ferreira, M. A. R. & Purcell, S. M. A multivariate test of association. *Bioinformatics* **25**,  
580 132–133 (2008).  
581 75. Purcell, S. *et al.* PLINK: A tool set for whole-genome association and population-based  
582 linkage analyses. *Am. J. Hum. Genet.* **81**, 559–575 (2007).  
583 76. FlyBase Curators, Swiss-Prot Project Members InterPro Project Members. Gene Ontology  
584 annotation in FlyBase through association of InterPro records with GO terms. (2004).  
585 77. Babu, K., Bahri, S., Alpey, L. & Chia, W. Bifocal and PP1 interaction regulates targeting  
586 of the R-cell growth cone in *Drosophila*. *Dev. Biol.* **288**, 372–386 (2005).  
587 78. Bennett, D., Szoor, B., Gross, S., Vereshchagina, N. & Alpey, L. Ectopic expression of  
588 inhibitors of Protein phosphatase type 1 (PP1) can be used to analyze roles of PP1 in  
589 *Drosophila* development. *Genetics* **164**, 235–245 (2003).  
590 79. Gaudet, P., Livstone, M. & Thomas, P. Gene Ontology annotation inferences using  
591 phylogenetic trees. GO Reference Genome Project. (2010).  
592 80. Giagtzoglou, N. *et al.* *deHBP1* controls exocytosis and recycling of *Delta* during  
593 asymmetric divisions. *J. Cell Biol.* **196**, 65–83 (2012).  
594 81. Cronin, S. J. F. *et al.* Genome-wide RNAi screen identifies genes involved in intestinal  
595 pathogenic bacterial infection. *Science* **325**, 340–343 (2009).  
596 82. Newton, I. L. G., Savytskyy, O. & Sheehan, K. B. Wolbachia utilize host actin for efficient  
597 maternal transmission in *Drosophila melanogaster*. *PLoS Pathog* **11**, e1004798 (2015).  
598 83. Chiba, A. Early development of the *Drosophila* neuromuscular junction: a model for  
599 studying neuronal networks in development. *Int. Rev. Neurobiol.* (1999).  
600 84. Yampolsky, L. Y. & Stoltzfus, A. The exchangeability of amino acids in proteins. *Genetics*  
601 **170**, 1459–1472 (2005).  
602 85. Creixell, P., Schoof, E. M., Tan, C. S. H. & Lindig, R. Mutational properties of amino acid



- 603 residues: implications for evolvability of phosphorylatable residues. *Philos. Trans. R. Soc. B*  
604 **367**, 2584–2593 (2012).
- 605 86. Leone, A. *et al.* Evidence for nm23 RNA overexpression, DNA amplification and mutation  
606 in aggressive childhood neuroblastomas. *Oncogene* **8**, 855–865 (1993).
- 607 87. Ishiko, A. *et al.* A novel leucine to valine mutation in residue 7 of the helix initiation motif  
608 of Keratin10 leads to bullous congenital ichthyosiform erythroderma. *J. Inv. Dermatol.* **116**,  
609 991–992 (2001).
- 610 88. Mahowald, A. P. Assembly of the *Drosophila* germ plasm. *Int. Rev. Cytol.* **203**, 187–213  
611 (2001).
- 612 89. Kose, H. & Karr, T. L. Organization of *Wolbachia pipientis* in the *Drosophila* fertilized egg  
613 and embryo revealed by an anti-*Wolbachia* monoclonal antibody. *Mech. Dev.* **51**, 275–288  
614 (1995).
- 615 90. Serbus, L. R. *et al.* A feedback loop between *Wolbachia* and the *Drosophila gurken* mRNP  
616 complex influences *Wolbachia* titer. *J. Cell Sci.* **124**, 4299–4308 (2012).
- 617 91. Ballard, J. W. O. Comparative genomics of mitochondrial DNA in *Drosophila simulans*. *J.*  
618 *Mol. Evol.* **51**, 64–75 (2000).
- 619 92. Vinh, D. B. N., Ko, D. C., Rachubinski, R. A., Aitchison, J. D. & Miller, S. I. Expression of  
620 the *Salmonella spp.* virulence factor SifA in yeast alters Rho1 activity on peroxisomes. *Mol.*  
621 *Biol. Cell* **21**, 3567–3577 (2010).
- 622 93. Brumell, J. H., Goosney, D. L. & Finlay, B. B. SifA, a type III secreted effector of  
623 *Salmonella typhimurium*, directs *Salmonella*-induced filament (Sif) formation along  
624 microtubules. *Traffic* **3**, 407–415 (2002).
- 625 94. Siozios, S. *et al.* The diversity and evolution of *Wolbachia* ankyrin repeat domain genes.  
626 *PLoS ONE* **8**, e55390 (2013).
- 627 95. Bork, P. Hundreds of ankyrin-like repeats in functionally diverse proteins: mobile modules  
628 that cross phyla horizontally? *Proteins* **17**, 363–374 (1993).
- 629 96. Habyarimana, F. *et al.* Role for the Ankyrin eukaryotic-like genes of *Legionella*  
630 *pneumophila* in parasitism of protozoan hosts and human macrophages. *Environ. Microbiol.*  
631 **10**, 1460–1474 (2008).
- 632 97. Veneti, Z., Clark, M. E., Karr, T. L., Savakis, C. & Bourtzis, K. Heads or Tails: Host-  
633 Parasite Interactions in the *Drosophila*-*Wolbachia* System. *App. Env. Microbiol.* **70**, 5366–  
634 5372 (2004).
- 635
